# Supplementary material
Source: Springer Nature journal article supplement (https://www.springermedizin.de/resource/supplementary/12891_2009_691_MOESM2_ESM.pdf/9506194)

|  |    |          |        |          |  |
|--|----|----------|--------|----------|--|
|  | BP |          | Non-BP |          |  |
|  | AF | Total AF | AF     | Total AF |  |

Observed [95% CI]

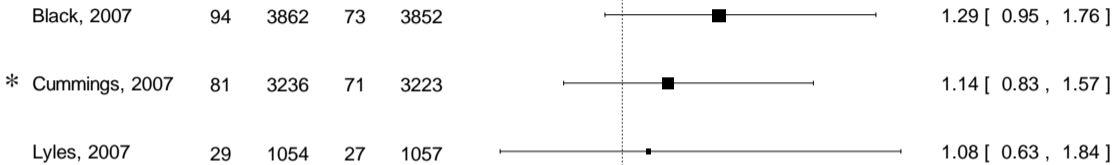

RE Model

1.18 [ 0.84 , 1.66 ]

0.39      0.81      1.23      1.66      2.08

Odds Ratio

Supplement: MOESM2 [file 9506194]
